# Supplementary material
Source: publisher figshare collection journal article supplement (https://acs.figshare.com/ndownloader/files/4913383)
Supplement: Supplementary file 1 [file 4913383]

## A PDMS-Paper Hybrid Lateral Flow Assay for Highly Sensitive Point-of-Care Nucleic Acid Testing

Jane Ru Choi<sup>1,2,3</sup>, Zhi Liu<sup>3,4</sup>, Jie Hu<sup>1,3</sup>, Ruihua Tang<sup>1,3,5,6</sup>, Yan Gong<sup>1,3</sup>, Shangsheng Feng<sup>3,7,8</sup>, Hui Ren<sup>3,9</sup>, Ting Wen<sup>10</sup>, Hui Yang<sup>5,6</sup>, Zhiguo Qu<sup>4</sup>, Belinda Pinguang-Murphy<sup>2</sup>, Feng Xu<sup>1,3\*</sup>

<sup>1</sup> The Key Laboratory of Biomedical Information Engineering of Ministry of Education, School of Life Science and Technology, Xi'an Jiaotong University, Xi'an 710049, PR China.

<sup>2</sup> Department of Biomedical Engineering, Faculty of Engineering, University of Malaya, Lembah Pantai, 50603 Kuala Lumpur, Malaysia.

<sup>3</sup> Bioinspired Engineering and Biomechanics Center (BEBC), Xi'an Jiaotong University, Xi'an 710049, PR China.

<sup>4</sup> Key Laboratory of Thermo-Fluid Science and Engineering of Ministry of Education, School of Energy and Power Engineering, Xi'an Jiaotong University, Xi'an 710049, PR China.

<sup>5</sup> School of Life Sciences, Northwestern Polytechnical University, Xi'an 710072, PR China.

<sup>6</sup> Key Laboratory of Space Bioscience and Biotechnology, Northwestern Polytechnical University, Xi'an 710072, PR China.

<sup>7</sup> MOE Key Laboratory of Multifunctional Materials and Structures (LMMS), School of Aerospace, Xi'an Jiaotong University, Xi'an 710049, PR China.

<sup>8</sup> State Key Laboratory of Mechanical Structure Strength and Vibration, School of Aerospace, Xi'an Jiaotong University, Xi'an 710049, PR China.

<sup>9</sup> Department of Respiratory and Critical Care Medicine, The First Affiliated Hospital of Xi'an Jiaotong University, Xi'an 710061, PR China.

<sup>10</sup> Xi'an Diandi Biotech Company, Xi'an, PR China.

\* Corresponding author: fengxu@mail.xjtu.edu.cn

### Table of contents

|                                                        |     |
|--------------------------------------------------------|-----|
| Selection of an appropriate shunt material             | S-2 |
| Schematic of modified lateral flow strips              | S-3 |
| The average velocity at the test zone                  | S-4 |
| Characterization of LFA incorporated with PDMS barrier | S-5 |
| Oligonucleotide sequences used in the study            | S-6 |
| HBV-positive clinical samples confirmed by qPCR        | S-7 |

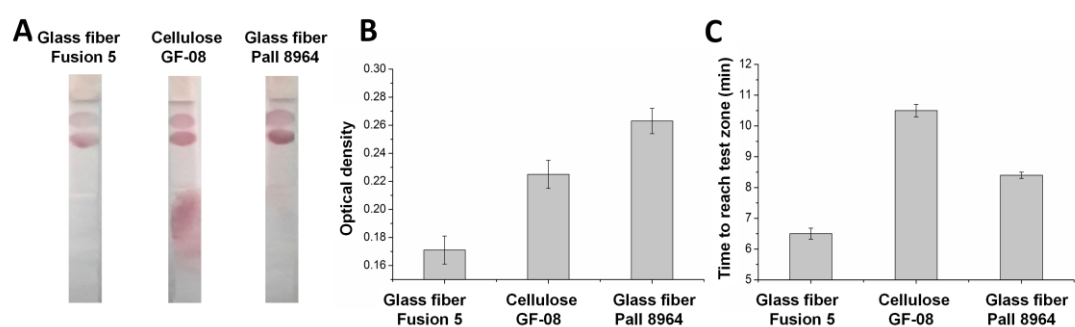

**Supplementary Figure S1. Selection of an appropriate shunt material. (A-B)**

Glass fiber Pall 8964 showed a significant higher optical density of the test zone ( $0.225 \pm 0.01$ ) with (C) desirable duration required to reach the test zone as compared to that of Fusion 5 and Cellulose.

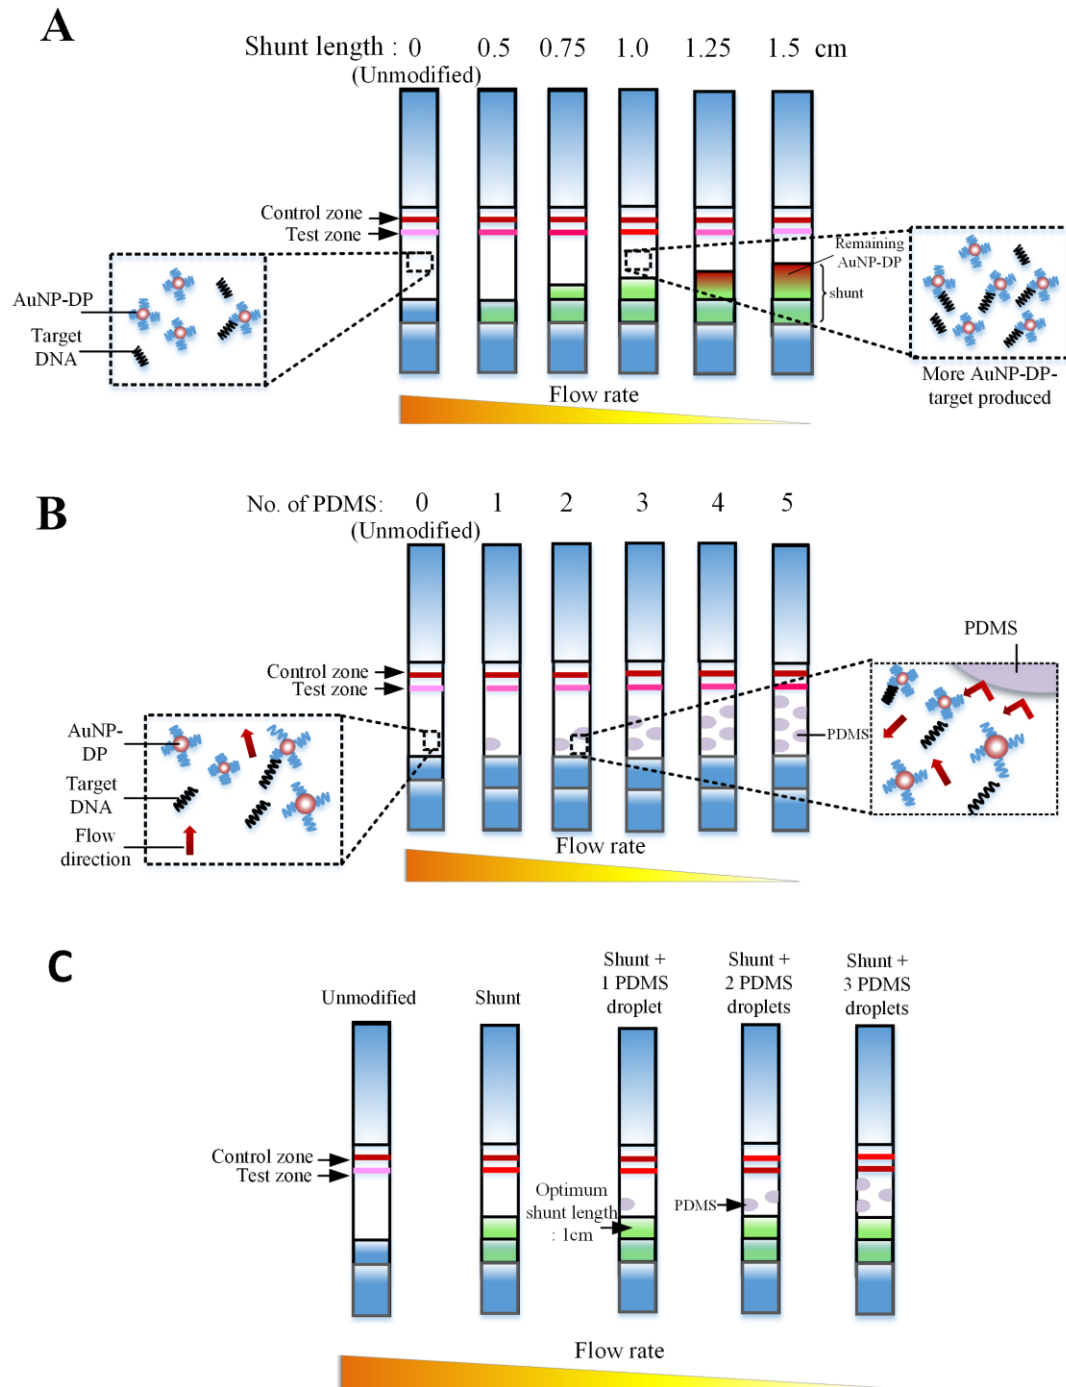

**Supplementary Figure S2. Schematic of modified lateral flow strips. (A)** Lateral flow strips with glass fiber shunt, **(B)** PDMS barrier and **(C)** the combination of both glass fiber shunt and PDMS barrier.

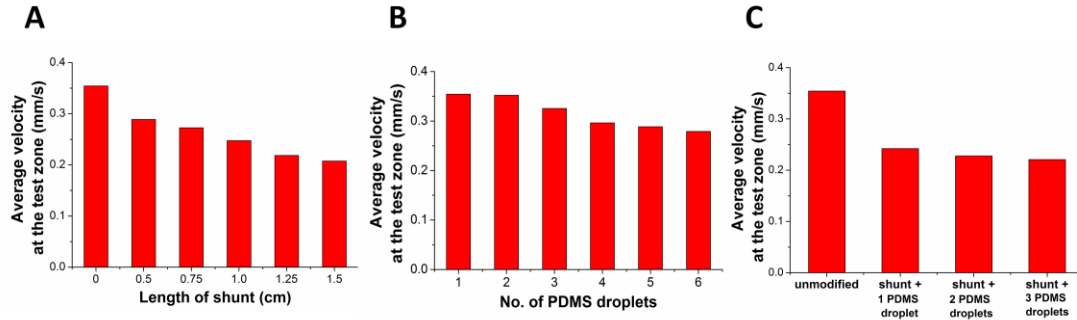

**Supplementary Figure S3. The average velocity at the test zone. (A)** The longer the length of the shunt, the lower the average velocity at the test zone. **(B)** The higher the number of PDMS droplets, the lower the average velocity at the test zone. **(C)** The combination of both shunt and PDMS droplets decreases the average velocity at the test zone.

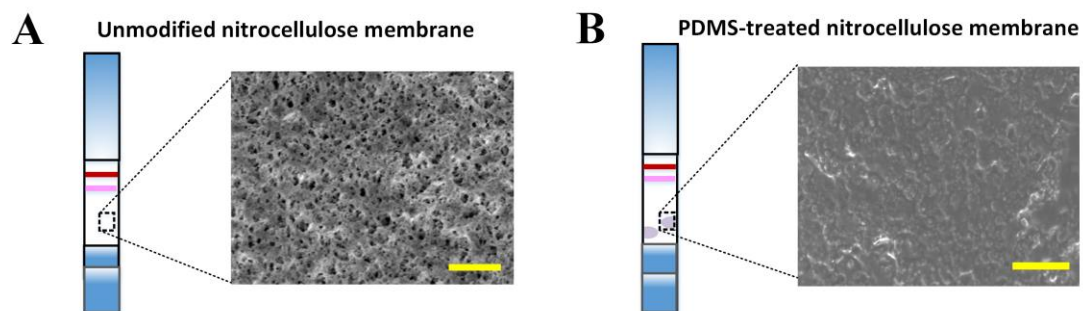

**Supplementary Figure S4. Characterization of LFA incorporated with PDMS barrier.** The SEM images of (i) unmodified nitrocellulose membrane and (ii) PDMS treated nitrocellulose membrane (Scale bars, 50  $\mu\text{m}$ ).

**Supplementary Table 1. Oligonucleotide sequences used in the study**

| Name               | Sequence (5'-3')                                                  |
|--------------------|-------------------------------------------------------------------|
| HBV detector probe | 5' - atgaatctggccacctgggt -(CH <sub>2</sub> ) <sub>6</sub> -SH-3' |
| HBV control probe  | 5' - acccaggtggccagattcat /Biotin-3'                              |
| HBV F3             | 5' - cttctgtggagtactctctt-3'                                      |
| HBV B3             | 5' - gctgactactaattccctgg-3'                                      |
| HBV FIP            | 5'-Biotin/ ctcccatacagagcagaggttgccttctgacttctttcc-3'             |
| HBV BIP            | 5' - ttgtcacctcaccatacagcatgggtcttccaaattacttcc-3'                |
| HBV FLP            | 5' - ggtgtcgaggagatctcgaata-3'                                    |
| HBV BLP            | 5' - attctgtgtggggtgagtt-3'                                       |
| HBV target DNA     | 5' - acccaggtggccagattcat -3'                                     |

**Supplementary Table 2. HBV-positive clinical samples confirmed by qPCR**

| Sample | Concentration (IU/mL) |
|--------|-----------------------|
| a      | $3.18 \times 10^5$    |
| b      | $7.33 \times 10^6$    |
| c      | $1.96 \times 10^5$    |
| d      | $1.34 \times 10^2$    |
| e      | $3.07 \times 10^3$    |
| f      | $1.56 \times 10^2$    |
| g      | $2.72 \times 10^4$    |
| h      | $1.92 \times 10^7$    |
| i      | $2.92 \times 10^4$    |
| j      | $5.35 \times 10^8$    |
| k      | $3.42 \times 10^8$    |
| l      | $2.04 \times 10^2$    |
| m      | $2.64 \times 10^3$    |
| n      | $7.07 \times 10^6$    |
| o      | $2.72 \times 10^4$    |
| p      | $1.59 \times 10^2$    |
